# Supplementary material for: Identification and availability of peptides from lactoferrin in the gastrointestinal tract of mice
Source: Royal Society of Chemistry journal article supplement (doi:10.1039/c8fo01998c), 2019-01-01
Supplement: c8fo01998c1.pdf [file c8fo01998c1.pdf]

**Table S1** The 848 peptides identified by CESI-Q-TOF-MS.

| No. | Peptide sequence | Mr. calc | Sample          | No. | Peptide sequence  | Mr. calc | Sample          |
|-----|------------------|----------|-----------------|-----|-------------------|----------|-----------------|
| 1   | AAEIYGTKESPQTHY  | 1693.795 | Stomach (0.5 h) | 16  | AEIYGTKESPQTHYYAV | 1955.927 | Stomach (0.5 h) |
| 2   | AAHVKQV          | 751.4341 | Stomach (0.5 h) | 17  | AGRDPYKLRP        | 1171.646 | Stomach (0.5 h) |
| 3   | AAHVKQVL         | 864.5181 | Stomach (0.5 h) | 18  | AGRDPYKLRPV       | 1270.715 | Stomach (0.5 h) |
| 4   | AAHVKQVLL        | 977.6022 | Stomach (0.5 h) | 19  | AIAEKKADAVTLDGGMV | 1687.882 | Stomach (0.5 h) |
| 5   | AAHVKQVLLHQ      | 1242.72  | Stomach (0.5 h) | 20  | AIAEKKADAVTLDGGMV | 1850.945 | Stomach (0.5 h) |
| 6   | AAHVKQVLLHQQ     | 1370.778 | Stomach (0.5 h) | 21  | AIANLKK           | 756.4857 | Stomach (0.5 h) |
| 7   | AAHVKQVLLHQQAL   | 1554.899 | Stomach (0.5 h) | 22  | AKLGGRPT          | 798.4712 | Stomach (0.5 h) |
| 8   | ADRDQYELL        | 1121.535 | Stomach (0.5 h) | 23  | AKLGGRPTY         | 961.5345 | Stomach (0.5 h) |
| 9   | AEDVGDV          | 703.3025 | Stomach (0.5 h) | 24  | ALNLDGGYIY        | 1097.539 | Stomach (0.5 h) |
| 10  | AEIYGTK          | 780.4017 | Stomach (0.5 h) | 25  | ALYLGSRV          | 941.497  | Stomach (0.5 h) |
| 11  | AEIYGTKESPQ      | 1221.588 | Stomach (0.5 h) | 26  | ANEGLTWNSL        | 1103.525 | Stomach (0.5 h) |
| 12  | AEIYGTKESPQT     | 1322.635 | Stomach (0.5 h) | 27  | ANEGLTWNSLK       | 1231.62  | Stomach (0.5 h) |
| 13  | AEIYGTKESPQTH    | 1459.694 | Stomach (0.5 h) | 28  | ANEGLTWNSLKD      | 1346.647 | Stomach (0.5 h) |
| 14  | AEIYGTKESPQTHY   | 1622.758 | Stomach (0.5 h) | 29  | ANEGLTWNSLKDK     | 1474.742 | Stomach (0.5 h) |
| 15  | AEIYGTKESPQTHYY  | 1785.821 | Stomach (0.5 h) | 30  | AQEKFGK           | 806.4286 | Stomach (0.5 h) |

(continue)

| No. | Peptide sequence   | Mr. calc | Sample          | No. | Peptide sequence | Mr. calc | Sample          |
|-----|--------------------|----------|-----------------|-----|------------------|----------|-----------------|
| 31  | AQEKFGKNK          | 1048.567 | Stomach (0.5 h) | 46  | DGAGDVA          | 603.25   | Stomach (0.5 h) |
| 32  | AVAVVKKGSNF        | 1118.645 | Stomach (0.5 h) | 47  | DGAGDVAFVKETTVF  | 1554.757 | Stomach (0.5 h) |
| 33  | AVAVVKKGSNFQ       | 1246.703 | Stomach (0.5 h) | 48  | DGGMVFEAGRDP     | 1249.54  | Stomach (0.5 h) |
| 34  | AVAVVKKGSNFQL      | 1359.787 | Stomach (0.5 h) | 49  | DGGMVFEAGRDPY    | 1412.603 | Stomach (0.5 h) |
| 35  | AVAVVKKGSNFQLDQLQG | 2057.138 | Stomach (0.5 h) | 50  | DGKEDLI          | 788.3916 | Stomach (0.5 h) |
| 36  | AVDRTAGWNIP        | 1198.61  | Stomach (0.5 h) | 51  | DGKEDLIWK        | 1102.566 | Stomach (0.5 h) |
| 37  | AVTLDGGM           | 778.3531 | Stomach (0.5 h) | 52  | DLLFKDSAL        | 1020.549 | Stomach (0.5 h) |
| 38  | AVTLDGGMV          | 877.4215 | Stomach (0.5 h) | 53  | DLLFKDSALG       | 1077.571 | Stomach (0.5 h) |
| 39  | AVTLDGGMVF         | 1008.495 | Stomach (0.5 h) | 54  | DLLFKDSALGF      | 1224.639 | Stomach (0.5 h) |
| 40  | AVVARSVD           | 815.4501 | Stomach (0.5 h) | 55  | DLLFKDSALGFL     | 1337.723 | Stomach (0.5 h) |
| 41  | AVVARSVDGKED       | 1244.636 | Stomach (0.5 h) | 56  | DRDQYELL         | 1050.498 | Stomach (0.5 h) |
| 42  | AVVARSVDGKEDL      | 1357.72  | Stomach (0.5 h) | 57  | DSALGFL          | 721.3647 | Stomach (0.5 h) |
| 43  | AVVARSVDGKEDLIWKL  | 1898.063 | Stomach (0.5 h) | 58  | EAGRDPY          | 806.3559 | Stomach (0.5 h) |
| 44  | AVVKKGSNFQLDQLQG   | 1730.932 | Stomach (0.5 h) | 59  | EAGRDPYK         | 934.4508 | Stomach (0.5 h) |
| 45  | DAVTLDGGMVF        | 1139.517 | Stomach (0.5 h) | 60  | EAGRDPYKLRP      | 1300.689 | Stomach (0.5 h) |

(continue)

| No. | Peptide sequence  | Mr. calc | Sample          | No. | Peptide sequence | Mr. calc | Sample          |
|-----|-------------------|----------|-----------------|-----|------------------|----------|-----------------|
| 61  | EAGRDPYKLRPV      | 1399.757 | Stomach (0.5 h) | 76  | ENTNGESTADWAK    | 1421.606 | Stomach (0.5 h) |
| 62  | EAGRDPYKLRPVA     | 1470.794 | Stomach (0.5 h) | 77  | EPLQGAVAK        | 911.5076 | Stomach (0.5 h) |
| 63  | EAGRDPYKLRPVAA    | 1541.831 | Stomach (0.5 h) | 78  | EPLQGAVAKF       | 1058.576 | Stomach (0.5 h) |
| 64  | EAGRDPYKLRPVAAEIY | 1947.021 | Stomach (0.5 h) | 79  | ESPQTHY          | 860.3664 | Stomach (0.5 h) |
| 65  | EEYLGTEY          | 1002.418 | Stomach (0.5 h) | 80  | ETAEEVK          | 804.3865 | Stomach (0.5 h) |
| 66  | EIYGTKESPQTHY     | 1551.721 | Stomach (0.5 h) | 81  | ETAEEVKA         | 875.4236 | Stomach (0.5 h) |
| 67  | ENLPEKAD          | 914.4345 | Stomach (0.5 h) | 82  | ETTVFENLPEK      | 1305.645 | Stomach (0.5 h) |
| 68  | ENLPEKADR         | 1070.536 | Stomach (0.5 h) | 83  | ETTVFENLPEKADRQ  | 1890.896 | Stomach (0.5 h) |
| 69  | ENLPEKADRQ        | 1185.563 | Stomach (0.5 h) | 84  | FENLPEKADRQ      | 1460.69  | Stomach (0.5 h) |
| 70  | ENLPEKADRQ        | 1313.621 | Stomach (0.5 h) | 85  | FENLPEKADRQYEL   | 1865.88  | Stomach (0.5 h) |
| 71  | ENLPEKADRQY       | 1476.684 | Stomach (0.5 h) | 86  | FGSPPGQR         | 844.4192 | Stomach (0.5 h) |
| 72  | ENLPEKADRQYE      | 1605.727 | Stomach (0.5 h) | 87  | FGSPPGQRD        | 959.4461 | Stomach (0.5 h) |
| 73  | ENLPEKADRQYEL     | 1718.811 | Stomach (0.5 h) | 88  | FGSPPGQRDL       | 1072.53  | Stomach (0.5 h) |
| 74  | ENLPEKADRQYELL    | 1831.895 | Stomach (0.5 h) | 89  | FGSPPGQRDLL      | 1185.614 | Stomach (0.5 h) |
| 75  | ENTNGESTADWA      | 1293.511 | Stomach (0.5 h) | 90  | FGSPPGQRDLLFK    | 1460.778 | Stomach (0.5 h) |

(continue)

| No. | Peptide sequence | Mr. calc | Sample          | No. | Peptide sequence       | Mr. calc | Sample          |
|-----|------------------|----------|-----------------|-----|------------------------|----------|-----------------|
| 91  | FGSPPGQRDLLFKD   | 1575.805 | Stomach (0.5 h) | 106 | GGRPTYEEYLGTEYV        | 1732.794 | Stomach (0.5 h) |
| 92  | FKDSALGF         | 883.444  | Stomach (0.5 h) | 107 | GGRPTYEEYLGTEYVT       | 1833.842 | Stomach (0.5 h) |
| 93  | FKSETKN          | 852.4341 | Stomach (0.5 h) | 108 | GGRPTYEEYLGTEYVTA      | 1904.879 | Stomach (0.5 h) |
| 94  | FKSETKNL         | 965.5182 | Stomach (0.5 h) | 109 | GILRPYL                | 830.5014 | Stomach (0.5 h) |
| 95  | FKSETKNLL        | 1078.602 | Stomach (0.5 h) | 110 | GILRPYLSWTESLEP        | 1759.915 | Stomach (0.5 h) |
| 96  | FKSETKNLLFND     | 1454.741 | Stomach (0.5 h) | 111 | GILRPYLSWTESLEPL       | 1872.999 | Stomach (0.5 h) |
| 97  | GAGDVAFVKETTV    | 1292.661 | Stomach (0.5 h) | 112 | GILRPYLSWTESLEPLQGA    | 2129.116 | Stomach (0.5 h) |
| 98  | GAGDVAFVKETTVF   | 1439.73  | Stomach (0.5 h) | 113 | GILRPYLSWTESLEPLQGAVA  | 2299.221 | Stomach (0.5 h) |
| 99  | GESTADW          | 764.2977 | Stomach (0.5 h) | 114 | GILRPYLSWTESLEPLQGAVAK | 2427.316 | Stomach (0.5 h) |
| 100 | GESTADWAK        | 963.4298 | Stomach (0.5 h) | 115 | GILRPYLSWTESLEPLQGAVAK | 2574.385 | Stomach (0.5 h) |
| 101 | GESTADWAKNL      | 1190.557 | Stomach (0.5 h) | 116 | GMVFEAGRDPY            | 1240.555 | Stomach (0.5 h) |
| 102 | GGRPTYEE         | 907.4035 | Stomach (0.5 h) | 117 | GRDPYKLRP              | 1100.609 | Stomach (0.5 h) |
| 103 | GGRPTYEEY        | 1070.467 | Stomach (0.5 h) | 118 | GRDPYKLRPV             | 1199.678 | Stomach (0.5 h) |
| 104 | GGRPTYEEYLGTE    | 1470.663 | Stomach (0.5 h) | 119 | GRDPYKLRPVA            | 1270.715 | Stomach (0.5 h) |
| 105 | GGRPTYEEYLGTEY   | 1633.726 | Stomach (0.5 h) | 120 | GRPTYEE                | 850.3821 | Stomach (0.5 h) |

(continue)

| No. | Peptide sequence | Mr. calc | Sample          | No. | Peptide sequence  | Mr. calc | Sample          |
|-----|------------------|----------|-----------------|-----|-------------------|----------|-----------------|
| 121 | GRPTYEEY         | 1013.445 | Stomach (0.5 h) | 136 | IAEKKAD           | 773.4283 | Stomach (0.5 h) |
| 122 | GRPTYEEYL        | 1126.53  | Stomach (0.5 h) | 137 | IAEKKADA          | 844.4654 | Stomach (0.5 h) |
| 123 | GRPTYEEYLGTE     | 1413.641 | Stomach (0.5 h) | 138 | IAEKKADAVTLDGGMVF | 1763.913 | Stomach (0.5 h) |
| 124 | GRPTYEEYLGTEY    | 1576.705 | Stomach (0.5 h) | 139 | IIPMGILRPY        | 1171.679 | Stomach (0.5 h) |
| 125 | GRPTYEEYLGTEYV   | 1675.773 | Stomach (0.5 h) | 140 | IIPMGILRPYL       | 1284.763 | Stomach (0.5 h) |
| 126 | GRPTYEEYLGTEYVT  | 1776.821 | Stomach (0.5 h) | 141 | IIPMGILRPYLS      | 1371.795 | Stomach (0.5 h) |
| 127 | GSNFQLDQLQGR     | 1361.669 | Stomach (0.5 h) | 142 | ILRPYLSW          | 1046.591 | Stomach (0.5 h) |
| 128 | GSPPGQRD         | 812.3777 | Stomach (0.5 h) | 143 | ILRPYLSWTE        | 1276.682 | Stomach (0.5 h) |
| 129 | GSPPGQRDL        | 925.4617 | Stomach (0.5 h) | 144 | ILRPYLSWTESLEPL   | 1815.977 | Stomach (0.5 h) |
| 130 | GSPPGQRDLL       | 1038.546 | Stomach (0.5 h) | 145 | IPSKVDS           | 744.4018 | Stomach (0.5 h) |
| 131 | GTKESPQTH        | 983.4672 | Stomach (0.5 h) | 146 | IYGTKESPQTHY      | 1422.678 | Stomach (0.5 h) |
| 132 | GTKESPQTHY       | 1146.531 | Stomach (0.5 h) | 147 | KADAVTLDGGMV      | 1175.586 | Stomach (0.5 h) |
| 133 | GTKESPQTHYY      | 1309.594 | Stomach (0.5 h) | 148 | KADAVTLDGGMVF     | 1322.654 | Stomach (0.5 h) |
| 134 | GTKESPQTHYYA     | 1380.631 | Stomach (0.5 h) | 149 | KADAVTLDGGMVFEAGR | 2110.999 | Stomach (0.5 h) |
| 135 | GWNIPMGL         | 886.4371 | Stomach (0.5 h) | 150 | KESPQTHY          | 988.4614 | Stomach (0.5 h) |

(continue)

| No. | Peptide sequence  | Mr. calc  | Sample          | No. | Peptide sequence  | Mr. calc | Sample          |
|-----|-------------------|-----------|-----------------|-----|-------------------|----------|-----------------|
| 151 | KGEADAL           | 702.3548  | Stomach (0.5 h) | 166 | LAVAVVKK          | 826.564  | Stomach (0.5 h) |
| 152 | KGEADALNLDG       | 1101.5302 | Stomach (0.5 h) | 167 | LAVAVVKKKA        | 897.6011 | Stomach (0.5 h) |
| 153 | KGEADALNLDGGY     | 1321.615  | Stomach (0.5 h) | 168 | LAVAVVKKKANEGLT   | 1411.84  | Stomach (0.5 h) |
| 154 | KGSNFQL           | 792.413   | Stomach (0.5 h) | 169 | LAVAVVKKKANEGLTW  | 1597.919 | Stomach (0.5 h) |
| 155 | KGSNFQLDQLQGR     | 1489.7637 | Stomach (0.5 h) | 170 | LAVAVVKKKANEGLTWN | 1912.078 | Stomach (0.5 h) |
| 156 | KLGRPTYEEYLGTEY   | 1874.905  | Stomach (0.5 h) | 171 | LAVAVVKKKANEGLTWN | 2040.173 | Stomach (0.5 h) |
| 157 | KLRPVAAEIY        | 1158.6761 | Stomach (0.5 h) | 172 | LEPLQGAVAK        | 1024.592 | Stomach (0.5 h) |
| 158 | KLRPVAAEIYGTKESPQ | 1886.0261 | Stomach (0.5 h) | 173 | LFKDSALGF         | 996.528  | Stomach (0.5 h) |
| 159 | KNLRETAEEVK       | 1315.7095 | Stomach (0.5 h) | 174 | LGGRPTY           | 762.4024 | Stomach (0.5 h) |
| 160 | KSETKNL           | 818.4498  | Stomach (0.5 h) | 175 | LGGRPTYEE         | 1020.488 | Stomach (0.5 h) |
| 161 | LAQVPSH           | 750.4024  | Stomach (0.5 h) | 176 | LGGRPTYEEY        | 1183.551 | Stomach (0.5 h) |
| 162 | LAVAPNH           | 720.3919  | Stomach (0.5 h) | 177 | LGGRPTYEEYL       | 1296.635 | Stomach (0.5 h) |
| 163 | LAVAPNHA          | 791.429   | Stomach (0.5 h) | 178 | LGGRPTYEEYLGTE    | 1583.747 | Stomach (0.5 h) |
| 164 | LAVAPNHAVVS       | 1076.5978 | Stomach (0.5 h) | 179 | LGGRPTYEEYLGTEY   | 1746.81  | Stomach (0.5 h) |
| 165 | LAVAVVK           | 698.4691  | Stomach (0.5 h) | 180 | LGGRPTYEEYLGTEYV  | 1845.879 | Stomach (0.5 h) |

(continue)

| No. | Peptide sequence  | Mr. calc | Sample          | No. | Peptide sequence   | Mr. calc | Sample          |
|-----|-------------------|----------|-----------------|-----|--------------------|----------|-----------------|
| 181 | LGGRPTYEEYLGTEYVT | 1946.926 | Stomach (0.5 h) | 196 | LRIPSKVDSALY       | 1360.771 | Stomach (0.5 h) |
| 182 | LGGRPTYEEYLGTEYVT | 2017.963 | Stomach (0.5 h) | 197 | LRPVAAEI           | 867.5178 | Stomach (0.5 h) |
| 183 | LGGRPTYEEYLGTEYVT | 2131.047 | Stomach (0.5 h) | 198 | LRPVAAEIY          | 1030.581 | Stomach (0.5 h) |
| 184 | LGGRPTYEEYLGTEYVT | 2202.084 | Stomach (0.5 h) | 199 | LRPYLSWTESLEPLQGAV | 2404.279 | Stomach (0.5 h) |
| 185 | LHQQALF           | 855.4603 | Stomach (0.5 h) | 200 | LSKAQEK            | 802.4548 | Stomach (0.5 h) |
| 186 | LLFKDSALG         | 962.5437 | Stomach (0.5 h) | 201 | LSKAQEKF           | 949.5233 | Stomach (0.5 h) |
| 187 | LLSKAQEKFGK       | 1247.724 | Stomach (0.5 h) | 202 | LSKAQEKFG          | 1006.545 | Stomach (0.5 h) |
| 188 | LLSKAQEKFGKNK     | 1489.862 | Stomach (0.5 h) | 203 | LSKAQEKFGK         | 1134.64  | Stomach (0.5 h) |
| 189 | LPEKADRDQ         | 1070.536 | Stomach (0.5 h) | 204 | LSKAQEKFGKN        | 1248.683 | Stomach (0.5 h) |
| 190 | LPEKADRDQY        | 1233.599 | Stomach (0.5 h) | 205 | LSKAQEKFGKNK       | 1376.778 | Stomach (0.5 h) |
| 191 | LRIPSKV           | 811.528  | Stomach (0.5 h) | 206 | LSWTESLEPL         | 1173.592 | Stomach (0.5 h) |
| 192 | LRIPSKVD          | 926.5549 | Stomach (0.5 h) | 207 | LSWTESLEPLQ        | 1301.65  | Stomach (0.5 h) |
| 193 | LRIPSKVDS         | 1013.587 | Stomach (0.5 h) | 208 | LSWTESLEPLQGA      | 1429.709 | Stomach (0.5 h) |
| 194 | LRIPSKVDSA        | 1084.624 | Stomach (0.5 h) | 209 | LSWTESLEPLQGAVA    | 1599.814 | Stomach (0.5 h) |
| 195 | LRIPSKVDSAL       | 1197.708 | Stomach (0.5 h) | 210 | LSWTESLEPLQGAVAK   | 1727.909 | Stomach (0.5 h) |

(continue)

| No. | Peptide sequence  | Mr. calc | Sample          | No. | Peptide sequence | Mr. calc | Sample          |
|-----|-------------------|----------|-----------------|-----|------------------|----------|-----------------|
| 211 | LSWTESLEPLQGAVAKF | 1874.978 | Stomach (0.5 h) | 226 | NEGLTWNSL        | 1032.488 | Stomach (0.5 h) |
| 212 | LSWTESLEPLQGAVAKF | 2022.046 | Stomach (0.5 h) | 227 | NEGLTWNSLK       | 1160.583 | Stomach (0.5 h) |
| 213 | LTTLKNL           | 801.496  | Stomach (0.5 h) | 228 | NEGLTWNSLKDK     | 1403.705 | Stomach (0.5 h) |
| 214 | LTTLKNLR          | 957.5971 | Stomach (0.5 h) | 229 | NEGLTWNSLKDKK    | 1531.799 | Stomach (0.5 h) |
| 215 | LTTLKNLRE         | 1086.64  | Stomach (0.5 h) | 230 | NLNREDF          | 906.4195 | Stomach (0.5 h) |
| 216 | LTTLKNLRET        | 1187.687 | Stomach (0.5 h) | 231 | NLPEKAD          | 785.3919 | Stomach (0.5 h) |
| 217 | LTTLKNLRETA       | 1258.725 | Stomach (0.5 h) | 232 | NLPEKADR         | 941.493  | Stomach (0.5 h) |
| 218 | LTTLKNLRETAE      | 1387.767 | Stomach (0.5 h) | 233 | NLPEKADR         | 1056.52  | Stomach (0.5 h) |
| 219 | LTTLKNLRETAEE     | 1516.81  | Stomach (0.5 h) | 234 | NLPEKADRQ        | 1184.579 | Stomach (0.5 h) |
| 220 | LTTLKNLRETAEEVK   | 1743.973 | Stomach (0.5 h) | 235 | NLPEKADRQY       | 1347.642 | Stomach (0.5 h) |
| 221 | LTTLKNLRETAEEVKA  | 1815.01  | Stomach (0.5 h) | 236 | NLPEKADRQYEL     | 1589.769 | Stomach (0.5 h) |
| 222 | LYLGSRY           | 870.4599 | Stomach (0.5 h) | 237 | NLRETAEEV        | 1059.52  | Stomach (0.5 h) |
| 223 | MGILRPY           | 848.4578 | Stomach (0.5 h) | 238 | NLRETAEEVKA      | 1258.652 | Stomach (0.5 h) |
| 224 | MGILRPYL          | 961.5419 | Stomach (0.5 h) | 239 | NSLKDKK          | 831.4814 | Stomach (0.5 h) |
| 225 | NEGLTWNS          | 919.4035 | Stomach (0.5 h) | 240 | NTNGESTADWAK     | 1292.563 | Stomach (0.5 h) |



(continue)

| No. | Peptide sequence | Mr. calc  | Sample          | No. | Peptide sequence               | Mr. calc  | Sample          |
|-----|------------------|-----------|-----------------|-----|--------------------------------|-----------|-----------------|
| 241 | PEKADRDQ         | 957.4516  | Stomach (0.5 h) | 256 | RPTYEEYLGTEYVT                 | 1719.7992 | Stomach (0.5 h) |
| 242 | PEKADRDQY        | 1120.5149 | Stomach (0.5 h) | 257 | RSVDGKEDL                      | 1017.5091 | Stomach (0.5 h) |
| 243 | QLDQLQG          | 800.4028  | Stomach (0.5 h) | 258 | RSVDGKEDLI                     | 1130.5931 | Stomach (0.5 h) |
| 244 | QLFGSPPGQRDL     | 1313.6728 | Stomach (0.5 h) | 259 | RSVDGKEDLIW                    | 1316.6725 | Stomach (0.5 h) |
| 245 | QLFGSPPGQRDLL    | 1426.7569 | Stomach (0.5 h) | 260 | RSVDGKEDLIWK                   | 1444.7674 | Stomach (0.5 h) |
| 246 | RPYKLRP          | 1043.5876 | Stomach (0.5 h) | 261 | RSVDGKEDLIWKLL                 | 1670.9355 | Stomach (0.5 h) |
| 247 | RPYKLRPVA        | 1213.6931 | Stomach (0.5 h) | 262 | RSVDGKEDLIWKLLS                | 1757.9676 | Stomach (0.5 h) |
| 248 | RETAEVKAR        | 1187.6258 | Stomach (0.5 h) | 263 | RTAGWNIP                       | 913.477   | Stomach (0.5 h) |
| 249 | RIPSKVDS         | 900.5029  | Stomach (0.5 h) | 264 | SAGWIIPM                       | 889.4368  | Stomach (0.5 h) |
| 250 | RIPSKVDSA        | 971.54    | Stomach (0.5 h) | 265 | SAGWIIPMG                      | 930.4633  | Stomach (0.5 h) |
| 251 | RIPSKVDSAL       | 1084.624  | Stomach (0.5 h) | 266 | SAGWIIPMGILRP                  | 1425.7802 | Stomach (0.5 h) |
| 252 | RPTYEEY          | 956.4239  | Stomach (0.5 h) | 267 | SAGWIIPMGILRPY                 | 1572.8486 | Stomach (0.5 h) |
| 253 | RPTYEEYLGTE      | 1356.6197 | Stomach (0.5 h) | 268 | SAGWIIPMGILRPYL                | 1685.9327 | Stomach (0.5 h) |
| 254 | RPTYEEYLGTEY     | 1519.6831 | Stomach (0.5 h) | 269 | SAGWIIPMGILRPYLSWT             | 2076.0866 | Stomach (0.5 h) |
| 255 | RPTYEEYLGTEYV    | 1618.7515 | Stomach (0.5 h) | 270 | SAGWIIPMGILRPYLSWTESLEPLQGAVAK | 3298.7424 | Stomach (0.5 h) |

(continue)

| No. | Peptide sequence | Mr. calc | Sample          | No. | Peptide sequence | Mr. calc | Sample          |
|-----|------------------|----------|-----------------|-----|------------------|----------|-----------------|
| 271 | SALYLGSRY        | 1028.529 | Stomach (0.5 h) | 286 | SVDGKEDLIWKL     | 1401.75  | Stomach (0.5 h) |
| 272 | SDRAAHVKQVL      | 1222.678 | Stomach (0.5 h) | 287 | SVDGKEDLIWKLL    | 1514.834 | Stomach (0.5 h) |
| 273 | SKAQEKFGK        | 1021.556 | Stomach (0.5 h) | 288 | SVDGKEDLIWKLLS   | 1601.867 | Stomach (0.5 h) |
| 274 | SKAQEKFGKKNK     | 1263.694 | Stomach (0.5 h) | 289 | SVDGKEDLIWKLLSK  | 1729.961 | Stomach (0.5 h) |
| 275 | SLEPLQGA         | 813.4232 | Stomach (0.5 h) | 290 | SWTESLEPL        | 1060.508 | Stomach (0.5 h) |
| 276 | SLEPLQGAVA       | 983.5287 | Stomach (0.5 h) | 291 | TAGWNIP          | 757.3759 | Stomach (0.5 h) |
| 277 | SLEPLQGAVAK      | 1111.624 | Stomach (0.5 h) | 292 | TAGWNIPM         | 904.4113 | Stomach (0.5 h) |
| 278 | SLEPLQGAVAKF     | 1258.692 | Stomach (0.5 h) | 293 | TAGWNIPMGL       | 1058.522 | Stomach (0.5 h) |
| 279 | SLEPLQGAVAKFF    | 1405.761 | Stomach (0.5 h) | 294 | TAVDRTAGWNIP     | 1299.657 | Stomach (0.5 h) |
| 280 | SPPGQRD          | 755.3562 | Stomach (0.5 h) | 295 | TESLEPL          | 787.3963 | Stomach (0.5 h) |
| 281 | SPPGQRDL         | 868.4403 | Stomach (0.5 h) | 296 | TESLEPLQG        | 972.4764 | Stomach (0.5 h) |
| 282 | SPPGQRDLL        | 981.5243 | Stomach (0.5 h) | 297 | TESLEPLQGA       | 1043.514 | Stomach (0.5 h) |
| 283 | SVDGKEDL         | 861.408  | Stomach (0.5 h) | 298 | TESLEPLQGAVA     | 1213.619 | Stomach (0.5 h) |
| 284 | SVDGKEDLIW       | 1160.571 | Stomach (0.5 h) | 299 | TESLEPLQGAVAK    | 1341.714 | Stomach (0.5 h) |
| 285 | SVDGKEDLIWK      | 1288.666 | Stomach (0.5 h) | 300 | TESLEPLQGAVAKF   | 1488.782 | Stomach (0.5 h) |

(continue)

| No. | Peptide sequence | Mr. calc | Sample          | No. | Peptide sequence  | Mr. calc | Sample          |
|-----|------------------|----------|-----------------|-----|-------------------|----------|-----------------|
| 301 | TLDGGMV          | 707.316  | Stomach (0.5 h) | 316 | VDRTAGWNIP        | 1127.572 | Stomach (0.5 h) |
| 302 | TLDGGMVFEAGRDPY  | 1626.735 | Stomach (0.5 h) | 317 | VKETTVF           | 822.4487 | Stomach (0.5 h) |
| 303 | TTLKNLR          | 844.513  | Stomach (0.5 h) | 318 | VKETTVFE          | 951.4913 | Stomach (0.5 h) |
| 304 | TTLKNLRE         | 973.5556 | Stomach (0.5 h) | 319 | VKETTVFENLPEKADRD | 2118.059 | Stomach (0.5 h) |
| 305 | TTVFENL          | 822.4123 | Stomach (0.5 h) | 320 | VKQVLLHQQAL       | 1275.766 | Stomach (0.5 h) |
| 306 | VAVVKKKA         | 713.48   | Stomach (0.5 h) | 321 | VLKGEAD           | 730.3861 | Stomach (0.5 h) |
| 307 | VAVVKKANEGLT     | 1227.719 | Stomach (0.5 h) | 322 | VLKGEADALNL       | 1141.634 | Stomach (0.5 h) |
| 308 | VAVVKKANEGLTW    | 1413.798 | Stomach (0.5 h) | 323 | VLRPTEG           | 770.4286 | Stomach (0.5 h) |
| 309 | VAVVKKANEGLTWN   | 1527.841 | Stomach (0.5 h) | 324 | VLRPTEGY          | 933.492  | Stomach (0.5 h) |
| 310 | VAVVKKANEGLTWNSL | 1727.957 | Stomach (0.5 h) | 325 | VLRPTEGYLA        | 1117.613 | Stomach (0.5 h) |
| 311 | VAVVKKG          | 699.4643 | Stomach (0.5 h) | 326 | VTAIANLK          | 828.5069 | Stomach (0.5 h) |
| 312 | VAVVKKGSNF       | 1047.608 | Stomach (0.5 h) | 327 | VTAIANLKK         | 956.6018 | Stomach (0.5 h) |
| 313 | VAVVKKGSNFQ      | 1175.666 | Stomach (0.5 h) | 328 | VVARSVDGKEDL      | 1286.683 | Stomach (0.5 h) |
| 314 | VAVVKKGSNFQL     | 1288.75  | Stomach (0.5 h) | 329 | VVKKANEGLTWNSLKD  | 1929.068 | Stomach (0.5 h) |
| 315 | VDGKEDLIWK       | 1201.634 | Stomach (0.5 h) | 330 | VVKKGSNF          | 877.5022 | Stomach (0.5 h) |

(continue)

| No. | Peptide sequence | Mr. calc | Sample          | No. | Peptide sequence    | Mr. calc | Sample          |
|-----|------------------|----------|-----------------|-----|---------------------|----------|-----------------|
| 331 | VVKKGSNFQ        | 1005.561 | Stomach (0.5 h) | 346 | YAVAVVKKGSNFQL      | 1522.851 | Stomach (0.5 h) |
| 332 | VVKKGSNFQLDQLQG  | 1659.894 | Stomach (0.5 h) | 347 | YAVAVVKKGSNFQLDQL   | 1879.02  | Stomach (0.5 h) |
| 333 | VVSRSDRAAHVKQ    | 1451.796 | Stomach (0.5 h) | 348 | YAVAVVKKGSNFQLDQLQG | 2064.1   | Stomach (0.5 h) |
| 334 | WAKNLNR          | 900.4929 | Stomach (0.5 h) | 349 | YAVAVVKKGSNFQLDQLQG | 2220.202 | Stomach (0.5 h) |
| 335 | WAKNLNRE         | 1029.536 | Stomach (0.5 h) | 350 | YEEYLG              | 873.3756 | Stomach (0.5 h) |
| 336 | WAKNLNRED        | 1144.563 | Stomach (0.5 h) | 351 | AAHVKQVL            | 730.3861 | Stomach (1 h)   |
| 337 | WIIPMGILRPY      | 1357.758 | Stomach (0.5 h) | 352 | AEIYGTK             | 1141.634 | Stomach (1 h)   |
| 338 | WIIPMGILRPYL     | 1470.842 | Stomach (0.5 h) | 353 | AEIYGTKESPQT        | 770.4286 | Stomach (1 h)   |
| 339 | WTESLEPLQGAVAK   | 1527.793 | Stomach (0.5 h) | 354 | AEIYGTKESPQTH       | 933.492  | Stomach (1 h)   |
| 340 | YAVAVVK          | 748.4483 | Stomach (0.5 h) | 355 | AEIYGTKESPQTHY      | 1117.613 | Stomach (1 h)   |
| 341 | YAVAVVKK         | 876.5433 | Stomach (0.5 h) | 356 | AEIYGTKESPQTHYY     | 828.5069 | Stomach (1 h)   |
| 342 | YAVAVVKKG        | 933.5647 | Stomach (0.5 h) | 357 | AIAEKKADA           | 956.6018 | Stomach (1 h)   |
| 343 | YAVAVVKKGSN      | 1134.64  | Stomach (0.5 h) | 358 | AKLGGRPT            | 1286.683 | Stomach (1 h)   |
| 344 | YAVAVVKKGSNF     | 1281.708 | Stomach (0.5 h) | 359 | AKLGGRPTY           | 1929.068 | Stomach (1 h)   |
| 345 | YAVAVVKKGSNFQ    | 1409.767 | Stomach (0.5 h) | 360 | AVAVVKKGSNFQ        | 877.5022 | Stomach (1 h)   |

(continue)

| No. | Peptide sequence | Mr. calc | Sample        | No. | Peptide sequence | Mr. calc | Sample        |
|-----|------------------|----------|---------------|-----|------------------|----------|---------------|
| 361 | AVAVVKKGSNFQL    | 1359.787 | Stomach (1 h) | 376 | EAGRDPYKLRP      | 1300.689 | Stomach (1 h) |
| 362 | AVTLDGGM         | 778.3531 | Stomach (1 h) | 377 | EAGRDPYKLRPV     | 1399.757 | Stomach (1 h) |
| 363 | AVTLDGGMV        | 877.4215 | Stomach (1 h) | 378 | EAGRDPYKLRPVA    | 1470.794 | Stomach (1 h) |
| 364 | AVTLDGGMVF       | 1024.49  | Stomach (1 h) | 379 | EAGRDPYKLRPVAA   | 1541.831 | Stomach (1 h) |
| 365 | AVVARSVDG        | 872.4716 | Stomach (1 h) | 380 | EIYGTKESPQTHY    | 1551.721 | Stomach (1 h) |
| 366 | AVVARSVDGK       | 1000.567 | Stomach (1 h) | 381 | ENLPEKA          | 799.4075 | Stomach (1 h) |
| 367 | AVVARSVDGKE      | 1129.609 | Stomach (1 h) | 382 | ENLPEKADR        | 1070.536 | Stomach (1 h) |
| 368 | AVVARSVDGKED     | 1244.636 | Stomach (1 h) | 383 | ENLPEKADRDRD     | 1185.563 | Stomach (1 h) |
| 369 | AVVARSVDGKEDL    | 1357.72  | Stomach (1 h) | 384 | ENLPEKADRDRDQ    | 1313.621 | Stomach (1 h) |
| 370 | AVVKKGSNFQL      | 1189.682 | Stomach (1 h) | 385 | ENLPEKADRDRDQY   | 1476.684 | Stomach (1 h) |
| 371 | AVVSRSDRAAHVKQ   | 1522.833 | Stomach (1 h) | 386 | ENLPEKADRDRDQYE  | 1605.727 | Stomach (1 h) |
| 372 | DGAGDVA          | 603.25   | Stomach (1 h) | 387 | ENTNGESTADWAKNL  | 1648.733 | Stomach (1 h) |
| 373 | DPYKLRPVA        | 1057.592 | Stomach (1 h) | 388 | EPLQGAVAK        | 911.5076 | Stomach (1 h) |
| 374 | EAGRDPY          | 806.3559 | Stomach (1 h) | 389 | EPLQGAVAKF       | 1058.576 | Stomach (1 h) |
| 375 | EAGRDPYKLR       | 1203.636 | Stomach (1 h) | 390 | ESPQTHY          | 860.3664 | Stomach (1 h) |

(continue)

| No. | Peptide sequence | Mr. calc | Sample        | No. | Peptide sequence | Mr. calc | Sample        |
|-----|------------------|----------|---------------|-----|------------------|----------|---------------|
| 391 | FGKNGKN          | 763.3977 | Stomach (1 h) | 406 | GSPPGQR          | 697.3507 | Stomach (1 h) |
| 392 | FGKNKSR          | 835.4664 | Stomach (1 h) | 407 | GSPPGQRDL        | 925.4617 | Stomach (1 h) |
| 393 | FGSPPGQR         | 844.4192 | Stomach (1 h) | 408 | GTKESPQTHY       | 1146.531 | Stomach (1 h) |
| 394 | FGSPPGQRD        | 959.4461 | Stomach (1 h) | 409 | GTKESPQTHYY      | 1309.594 | Stomach (1 h) |
| 395 | FGSPPGQRDL       | 1072.53  | Stomach (1 h) | 410 | GWIIPMGILR       | 1154.663 | Stomach (1 h) |
| 396 | FGSPPGQRDLL      | 1185.614 | Stomach (1 h) | 411 | GWIIPMGILRP      | 1251.716 | Stomach (1 h) |
| 397 | FKDSALGF         | 883.444  | Stomach (1 h) | 412 | GWIIPMGILRPYL    | 1527.864 | Stomach (1 h) |
| 398 | FKSETKN          | 852.4341 | Stomach (1 h) | 413 | HLAVAPNHAVVS     | 1213.657 | Stomach (1 h) |
| 399 | FKSETKNL         | 965.5182 | Stomach (1 h) | 414 | IAEKKAD          | 773.4283 | Stomach (1 h) |
| 400 | FKSETKNLL        | 1078.602 | Stomach (1 h) | 415 | IAEKKADA         | 844.4654 | Stomach (1 h) |
| 401 | GESTADWAKNL      | 1190.557 | Stomach (1 h) | 416 | IAEKKADAVTL      | 1157.666 | Stomach (1 h) |
| 402 | GILRPYL          | 830.5014 | Stomach (1 h) | 417 | IAEKKADAVTLDGGMV | 1632.839 | Stomach (1 h) |
| 403 | GRDPYKLRP        | 1100.609 | Stomach (1 h) | 418 | IIPMGILR         | 911.5626 | Stomach (1 h) |
| 404 | GRDPYKLRPV       | 1199.678 | Stomach (1 h) | 419 | IIPMGILRP        | 1008.615 | Stomach (1 h) |
| 405 | GRDPYKLRPVA      | 1270.715 | Stomach (1 h) | 420 | IIPMGILRPY       | 1171.679 | Stomach (1 h) |

(continue)

| No. | Peptide sequence | Mr. calc | Sample        | No. | Peptide sequence | Mr. calc | Sample        |
|-----|------------------|----------|---------------|-----|------------------|----------|---------------|
| 421 | IIPMGILRPYL      | 1284.763 | Stomach (1 h) | 436 | LAVAPNHA         | 791.429  | Stomach (1 h) |
| 422 | IPMGILRPYL       | 1171.679 | Stomach (1 h) | 437 | LAVAPNHAVVSR     | 1232.699 | Stomach (1 h) |
| 423 | IYGTKESPQTHY     | 1422.678 | Stomach (1 h) | 438 | LDGTRKPVTE       | 1114.598 | Stomach (1 h) |
| 424 | KAQEKFGKNKSR     | 1419.795 | Stomach (1 h) | 439 | LFKDSALGF        | 996.528  | Stomach (1 h) |
| 425 | KESPQTHY         | 988.4614 | Stomach (1 h) | 440 | LGGRPTY          | 762.4024 | Stomach (1 h) |
| 426 | KESPQTHYY        | 1151.525 | Stomach (1 h) | 441 | LPEKADR          | 827.4501 | Stomach (1 h) |
| 427 | KGEADAL          | 702.3548 | Stomach (1 h) | 442 | LPEKADRQY        | 1233.599 | Stomach (1 h) |
| 428 | KGEADALN         | 816.3977 | Stomach (1 h) | 443 | LRIPSKVD         | 926.5549 | Stomach (1 h) |
| 429 | KGEADALNL        | 929.4818 | Stomach (1 h) | 444 | LRIPSKVDS        | 1013.587 | Stomach (1 h) |
| 430 | KGEADALNLDG      | 1101.53  | Stomach (1 h) | 445 | LRIPSKVDSA       | 1084.624 | Stomach (1 h) |
| 431 | KGEADALNLDGGY    | 1321.615 | Stomach (1 h) | 446 | LRIPSKVDSAL      | 1197.708 | Stomach (1 h) |
| 432 | LAQVPSH          | 750.4024 | Stomach (1 h) | 447 | LSKAQEKFGKNK     | 1376.778 | Stomach (1 h) |
| 433 | LAQVPSHA         | 821.4395 | Stomach (1 h) | 448 | LSKAQEKFGKNKSR   | 1619.911 | Stomach (1 h) |
| 434 | LAQVPSHAVVA      | 1090.614 | Stomach (1 h) | 449 | LSKAQEKFGKNKSRS  | 1706.943 | Stomach (1 h) |
| 435 | LAVAPNH          | 720.3919 | Stomach (1 h) | 450 | LSKAQEKFGKNKSRSF | 1854.011 | Stomach (1 h) |

(continue)

| No. | Peptide sequence | Mr. calc | Sample        | No. | Peptide sequence | Mr. calc | Sample        |
|-----|------------------|----------|---------------|-----|------------------|----------|---------------|
| 451 | LTTLKNL          | 801.496  | Stomach (1 h) | 466 | RETAEVVKAR       | 1187.626 | Stomach (1 h) |
| 452 | LTTLKNLR         | 957.5971 | Stomach (1 h) | 467 | RIPSKVDS         | 900.5029 | Stomach (1 h) |
| 453 | LTTLKNLRE        | 1086.64  | Stomach (1 h) | 468 | RIPSKVDSA        | 971.54   | Stomach (1 h) |
| 454 | LTTLKNLRETA      | 1258.725 | Stomach (1 h) | 469 | RSAGWIIP         | 898.5025 | Stomach (1 h) |
| 455 | LTTLKNLRETAE     | 1387.767 | Stomach (1 h) | 470 | RSVDGKED         | 904.425  | Stomach (1 h) |
| 456 | LTTLKNLRETAEE    | 1516.81  | Stomach (1 h) | 471 | RSVDGKEDL        | 1017.509 | Stomach (1 h) |
| 457 | LTTLKNLRETAEEVK  | 1743.973 | Stomach (1 h) | 472 | RTAGWNIP         | 913.477  | Stomach (1 h) |
| 458 | LYLGSRY          | 870.4599 | Stomach (1 h) | 473 | SAGWIIPMGILR     | 1312.733 | Stomach (1 h) |
| 459 | MGILRPYL         | 961.5419 | Stomach (1 h) | 474 | SAGWIIPMGILRP    | 1409.785 | Stomach (1 h) |
| 460 | NLPEKADR         | 941.493  | Stomach (1 h) | 475 | SAGWIIPMGILRPY   | 1572.849 | Stomach (1 h) |
| 461 | PEKADR           | 829.393  | Stomach (1 h) | 476 | SAGWIIPMGILRPYL  | 1685.933 | Stomach (1 h) |
| 462 | PEKADRQY         | 1120.515 | Stomach (1 h) | 477 | SDRAAHVKQVL      | 1222.678 | Stomach (1 h) |
| 463 | PSKVDSAL         | 815.4389 | Stomach (1 h) | 478 | SKAQEKFGKNKSR    | 1506.827 | Stomach (1 h) |
| 464 | QLFGSPPGQRD      | 1200.589 | Stomach (1 h) | 479 | SKAQEKFGKNKSRS   | 1593.859 | Stomach (1 h) |
| 465 | RPYKLRPVA        | 1213.693 | Stomach (1 h) | 480 | SLEPLQGA         | 813.4232 | Stomach (1 h) |



(continue)

| No. | Peptide sequence | Mr. calc | Sample        | No. | Peptide sequence | Mr. calc | Sample        |
|-----|------------------|----------|---------------|-----|------------------|----------|---------------|
| 481 | SLEPLQGAVA       | 801.496  | Stomach (1 h) | 496 | VARSVDGKEDL      | 1187.615 | Stomach (1 h) |
| 482 | SLEPLQGAVAK      | 957.5971 | Stomach (1 h) | 497 | VAVVKKANEGL      | 1126.671 | Stomach (1 h) |
| 483 | SLEPLQGAVAKF     | 1086.64  | Stomach (1 h) | 498 | VAVVKKANEGLTWNSL | 1727.957 | Stomach (1 h) |
| 484 | SPPGQRDL         | 1258.725 | Stomach (1 h) | 499 | VAVVKKANEGLTWNSL | 1856.052 | Stomach (1 h) |
| 485 | SVDGKEDL         | 1387.767 | Stomach (1 h) | 500 | VAVVKKGSNFQ      | 1175.666 | Stomach (1 h) |
| 486 | TAEVKAR          | 1516.81  | Stomach (1 h) | 501 | VAVVKKGSNFQL     | 1288.75  | Stomach (1 h) |
| 487 | TAEVKARY         | 1743.973 | Stomach (1 h) | 502 | VDRTAGWNIP       | 1127.572 | Stomach (1 h) |
| 488 | TAGWNIPMGL       | 870.4599 | Stomach (1 h) | 503 | VKETTVE          | 951.4913 | Stomach (1 h) |
| 489 | TAVDRTAGWNIP     | 961.5419 | Stomach (1 h) | 504 | VKKGSNFQ         | 906.4923 | Stomach (1 h) |
| 490 | TESLEPLQG        | 941.493  | Stomach (1 h) | 505 | VKKGSNFQL        | 1019.576 | Stomach (1 h) |
| 491 | TESLEPLQGAVA     | 829.393  | Stomach (1 h) | 506 | VLKGEADAL        | 914.5073 | Stomach (1 h) |
| 492 | TESLEPLQGAVAK    | 1120.515 | Stomach (1 h) | 507 | VLKGEADALN       | 1028.55  | Stomach (1 h) |
| 493 | TESLEPLQGAVAKF   | 815.4389 | Stomach (1 h) | 508 | VLKGEADALNL      | 1141.634 | Stomach (1 h) |
| 494 | TTLKNLR          | 1200.589 | Stomach (1 h) | 509 | VLLHQQAL         | 920.5443 | Stomach (1 h) |
| 495 | TTLKNLRE         | 1213.693 | Stomach (1 h) | 510 | VLRPTEG          | 770.4286 | Stomach (1 h) |

(continue)

| No. | Peptide sequence | Mr. calc | Sample        | No. | Peptide sequence | Mr. calc | Sample        |
|-----|------------------|----------|---------------|-----|------------------|----------|---------------|
| 511 | VVARSVDGKED      | 1173.599 | Stomach (1 h) | 526 | AEDVGDVA         | 774.3396 | Stomach (2 h) |
| 512 | VVARSVDGKEDL     | 1286.683 | Stomach (1 h) | 527 | AGDDQGLD         | 789.3141 | Stomach (2 h) |
| 513 | VVKKGSNFQ        | 1005.561 | Stomach (1 h) | 528 | AKLGGRPTY        | 961.5345 | Stomach (2 h) |
| 514 | VVSRSDRAAHVKQ    | 1451.796 | Stomach (1 h) | 529 | AKLGGRPTYEE      | 1219.62  | Stomach (2 h) |
| 515 | WAKNLNR          | 900.4929 | Stomach (1 h) | 530 | ALNLDGGY         | 821.3919 | Stomach (2 h) |
| 516 | WAKNLNRED        | 1144.563 | Stomach (1 h) | 531 | AVTLDGGMVF       | 1008.495 | Stomach (2 h) |
| 517 | WIIPMGILR        | 1097.642 | Stomach (1 h) | 532 | AVVARSVDGKE      | 1129.609 | Stomach (2 h) |
| 518 | WIIPMGILRP       | 1194.695 | Stomach (1 h) | 533 | AVVARSVDGKED     | 1244.636 | Stomach (2 h) |
| 519 | WIIPMGILRPY      | 1357.758 | Stomach (1 h) | 534 | AVVARSVDGKEDL    | 1357.72  | Stomach (2 h) |
| 520 | WIIPMGILRPYL     | 1470.842 | Stomach (1 h) | 535 | AVVARSVDGKEDLIW  | 1656.884 | Stomach (2 h) |
| 521 | WTESLEPLQGAVAK   | 1527.793 | Stomach (1 h) | 536 | AVVKKGSNFQL      | 1189.682 | Stomach (2 h) |
| 522 | YAVAVVKKGSN      | 1134.64  | Stomach (1 h) | 537 | EAGRDPY          | 806.3559 | Stomach (2 h) |
| 523 | YAVAVVKKGSNFQ    | 1409.767 | Stomach (1 h) | 538 | EAGRDPYKLRPVA    | 1470.794 | Stomach (2 h) |
| 524 | YAVAVVKKGSNFQL   | 1522.851 | Stomach (1 h) | 539 | EEVKARY          | 893.4606 | Stomach (2 h) |
| 525 | YGYTGAFR         | 933.4345 | Stomach (1 h) | 540 | ENLPEKA          | 799.4075 | Stomach (2 h) |

(continue)

| No. | Peptide sequence | Mr. calc | Sample        | No. | Peptide sequence | Mr. calc | Sample        |
|-----|------------------|----------|---------------|-----|------------------|----------|---------------|
| 541 | ENLPEKADR        | 1070.536 | Stomach (2 h) | 556 | GWNIPMGL         | 902.432  | Stomach (2 h) |
| 542 | ENLPEKADRQ       | 1313.621 | Stomach (2 h) | 557 | IAEKKAD          | 773.4283 | Stomach (2 h) |
| 543 | ENLPEKADRQY      | 1476.684 | Stomach (2 h) | 558 | IAEKKADAVTL      | 1157.666 | Stomach (2 h) |
| 544 | ENLPEKADRQYE     | 1605.727 | Stomach (2 h) | 559 | IIPMGILRPY       | 1171.679 | Stomach (2 h) |
| 545 | FGSPPGQR         | 844.4192 | Stomach (2 h) | 560 | IIPMGILRPYL      | 1284.763 | Stomach (2 h) |
| 546 | FGSPPGQRD        | 959.4461 | Stomach (2 h) | 561 | IIPMGILRPYLS     | 1371.795 | Stomach (2 h) |
| 547 | FGSPPGQRDL       | 1072.53  | Stomach (2 h) | 562 | ILRPYLS          | 860.512  | Stomach (2 h) |
| 548 | FGSPPGQRDLL      | 1185.614 | Stomach (2 h) | 563 | ILRPYLSW         | 1046.591 | Stomach (2 h) |
| 549 | FKDSALGF         | 883.444  | Stomach (2 h) | 564 | ILRPYLSWT        | 1147.639 | Stomach (2 h) |
| 550 | FKSETKNL         | 965.5182 | Stomach (2 h) | 565 | ILRPYLSWTE       | 1276.682 | Stomach (2 h) |
| 551 | FKSETKNLL        | 1078.602 | Stomach (2 h) | 566 | KGEADAL          | 702.3548 | Stomach (2 h) |
| 552 | FVKETTVF         | 969.5172 | Stomach (2 h) | 567 | KGEADALNL        | 929.4818 | Stomach (2 h) |
| 553 | GRDPYKLRPVA      | 1270.715 | Stomach (2 h) | 568 | KKADAVTL         | 844.5018 | Stomach (2 h) |
| 554 | GTKESPQTHY       | 1146.531 | Stomach (2 h) | 569 | KLGAPSIT         | 785.4647 | Stomach (2 h) |
| 555 | GTKESPQTHYY      | 1309.594 | Stomach (2 h) | 570 | LAQVPSH          | 750.4024 | Stomach (2 h) |

(continue)

| No. | Peptide sequence | Mr. calc | Sample        | No. | Peptide sequence | Mr. calc | Sample        |
|-----|------------------|----------|---------------|-----|------------------|----------|---------------|
| 571 | LAVAPNH          | 720.3919 | Stomach (2 h) | 586 | LTTLKNLRETAE     | 1387.767 | Stomach (2 h) |
| 572 | LAVAPNHA         | 791.429  | Stomach (2 h) | 587 | LYLGSRY          | 870.4599 | Stomach (2 h) |
| 573 | LAVAPNHAVVSRSD   | 1434.758 | Stomach (2 h) | 588 | MGILRPY          | 848.4578 | Stomach (2 h) |
| 574 | LFKDSALGF        | 996.528  | Stomach (2 h) | 589 | MGILRPYL         | 961.5419 | Stomach (2 h) |
| 575 | LRIPSKVD         | 926.5549 | Stomach (2 h) | 590 | MGILRPYLS        | 1048.574 | Stomach (2 h) |
| 576 | LRIPSKVDS        | 1013.587 | Stomach (2 h) | 591 | MGILRPYLSW       | 1234.653 | Stomach (2 h) |
| 577 | LRIPSKVDSA       | 1084.624 | Stomach (2 h) | 592 | MGILRPYLSWTE     | 1464.744 | Stomach (2 h) |
| 578 | LRIPSKVDSAL      | 1197.708 | Stomach (2 h) | 593 | PEKADRDQY        | 1120.515 | Stomach (2 h) |
| 579 | LRIPSKVDSALY     | 1360.771 | Stomach (2 h) | 594 | RAAHVKQVL        | 1020.619 | Stomach (2 h) |
| 580 | LSKAQEKFGKNKSR   | 1619.911 | Stomach (2 h) | 595 | RPYLSWTE         | 1050.513 | Stomach (2 h) |
| 581 | LSKAQEKFGKNKSRS  | 1706.943 | Stomach (2 h) | 596 | RSVDGKEDL        | 1017.509 | Stomach (2 h) |
| 582 | LTTLKNL          | 801.496  | Stomach (2 h) | 597 | RTAGWNIP         | 913.477  | Stomach (2 h) |
| 583 | LTTLKNLR         | 957.5971 | Stomach (2 h) | 598 | RTAGWNIPMG       | 1101.539 | Stomach (2 h) |
| 584 | LTTLKNLRE        | 1086.64  | Stomach (2 h) | 599 | RTAGWNIPMGL      | 1214.623 | Stomach (2 h) |
| 585 | LTTLKNLRETA      | 1258.725 | Stomach (2 h) | 600 | SLEPLQGA         | 813.4232 | Stomach (2 h) |

(continue)

| No. | Peptide sequence | Mr. calc | Sample        | No. | Peptide sequence    | Mr. calc | Sample           |
|-----|------------------|----------|---------------|-----|---------------------|----------|------------------|
| 601 | SPPGQRD          | 755.3562 | Stomach (2 h) | 616 | WAKNLNRED           | 1144.563 | Stomach (2 h)    |
| 602 | TAEVKARY         | 1065.545 | Stomach (2 h) | 617 | WIIPMGILRP          | 1194.695 | Stomach (2 h)    |
| 603 | TAGWNIPMGL       | 1058.522 | Stomach (2 h) | 618 | WIIPMGILRPYL        | 1486.837 | Stomach (2 h)    |
| 604 | TAVDRTAGWNIPMGL  | 1600.803 | Stomach (2 h) | 619 | WIIPMGILRPYLS       | 1573.869 | Stomach (2 h)    |
| 605 | TESLEPLQGA       | 1043.514 | Stomach (2 h) | 620 | YAVAVVKKGGSNFQ      | 1409.767 | Stomach (2 h)    |
| 606 | TTLKNLRE         | 973.5556 | Stomach (2 h) | 621 | YAVAVVKKGGSNFQL     | 1522.851 | Stomach (2 h)    |
| 607 | VAVVKKANEGLTW    | 1413.798 | Stomach (2 h) | 622 | DQLQGRK             | 843.4563 | Stomach (3 h)    |
| 608 | VAVVKKANEGLTWNSL | 1727.957 | Stomach (2 h) | 623 | LAVAPNH             | 720.3919 | Stomach (3 h)    |
| 609 | VAVVKKGGSNFQL    | 1288.75  | Stomach (2 h) | 624 | AAHVKQVLLHQQ        | 1370.778 | Duodenum (0.5 h) |
| 610 | VKETTVF          | 822.4487 | Stomach (2 h) | 625 | AAHVKQVLLHQQAL      | 1554.899 | Duodenum (0.5 h) |
| 611 | VLKGEADAL        | 914.5073 | Stomach (2 h) | 626 | AVAVVKKGGSNFQLDQLQG | 1901.037 | Duodenum (0.5 h) |
| 612 | VLKGEADALNL      | 1141.634 | Stomach (2 h) | 627 | CAVGPEE             | 703.2847 | Duodenum (0.5 h) |
| 613 | VVKKANEGLTW      | 1243.693 | Stomach (2 h) | 628 | DCVLRPT             | 802.4007 | Duodenum (0.5 h) |
| 614 | VVKKANEGLTWNSL   | 1557.852 | Stomach (2 h) | 629 | DGGMVFEAGRDPY       | 1412.603 | Duodenum (0.5 h) |
| 615 | WAKNLNR          | 900.4929 | Stomach (2 h) | 630 | GDDQGLDK            | 846.3719 | Duodenum (0.5 h) |

(continue)

| No. | Peptide sequence   | Mr. calc | Sample           | No. | Peptide sequence    | Mr. calc | Sample           |
|-----|--------------------|----------|------------------|-----|---------------------|----------|------------------|
| 631 | GGRPTYEEYLGTEY     | 1633.726 | Duodenum (0.5 h) | 646 | LDCVLRPT            | 915.4848 | Duodenum (0.5 h) |
| 632 | GGRPTYEEYLGTEYVT   | 1833.842 | Duodenum (0.5 h) | 647 | LGGRPTYEEYLGTEY     | 1746.81  | Duodenum (0.5 h) |
| 633 | GILRPYL            | 830.5014 | Duodenum (0.5 h) | 648 | LGGRPTYEEYLGTEYVT   | 1946.926 | Duodenum (0.5 h) |
| 634 | GILRPYLSWTESLEPL   | 1872.999 | Duodenum (0.5 h) | 649 | LGGRPTYEEYLGTEYVTA  | 2017.963 | Duodenum (0.5 h) |
| 635 | GRPTYEEYLGTEY      | 1576.705 | Duodenum (0.5 h) | 650 | LGGRPTYEEYLGTEYVTAI | 2131.047 | Duodenum (0.5 h) |
| 636 | HLAQVPS            | 750.4024 | Duodenum (0.5 h) | 651 | LGGRPTYEEYLGTEYVTA  | 2202.084 | Duodenum (0.5 h) |
| 637 | KADAVTLDGGMVF      | 1338.649 | Duodenum (0.5 h) | 652 | LRIPSKVDSAL         | 1197.708 | Duodenum (0.5 h) |
| 638 | KANEGLT            | 731.3813 | Duodenum (0.5 h) | 653 | LRPVAAEIY           | 1030.581 | Duodenum (0.5 h) |
| 639 | KGSNFQLDQLQGR      | 1489.764 | Duodenum (0.5 h) | 654 | LSWTESLEPLQGAVAK    | 1727.909 | Duodenum (0.5 h) |
| 640 | KLRPVAAEIYGTKESPO  | 1886.026 | Duodenum (0.5 h) | 655 | LSWTESLEPLQGAVAKF   | 1874.978 | Duodenum (0.5 h) |
| 641 | LAVAVVKK           | 826.564  | Duodenum (0.5 h) | 656 | LTTLKNLR            | 957.5971 | Duodenum (0.5 h) |
| 642 | LAVAVVKKKA         | 897.6011 | Duodenum (0.5 h) | 657 | PSKVDSALYL          | 1091.586 | Duodenum (0.5 h) |
| 643 | LAVAVVKKKANEGLTW   | 1597.919 | Duodenum (0.5 h) | 658 | QLDQLQGR            | 956.5039 | Duodenum (0.5 h) |
| 644 | LAVAVVKKKANEGLTWN  | 1711.962 | Duodenum (0.5 h) | 659 | QLFGSPPGQR          | 1085.562 | Duodenum (0.5 h) |
| 645 | LAVAVVKKKANEGLTWNS | 1912.078 | Duodenum (0.5 h) | 660 | QVLLHQQALFGK        | 1380.788 | Duodenum (0.5 h) |

(continue)

| No. | Peptide sequence | Mr. calc | Sample           | No. | Peptide sequence | Mr. calc | Sample         |
|-----|------------------|----------|------------------|-----|------------------|----------|----------------|
| 661 | SAGWIIPMGILRPY   | 1588.844 | Duodenum (0.5 h) | 676 | AVAPNHAVVS       | 963.5138 | Duodenum (1 h) |
| 662 | SAGWIIPMGILRPYL  | 1701.928 | Duodenum (0.5 h) | 677 | HLAVAPNH         | 857.4508 | Duodenum (1 h) |
| 663 | SCAPGADPK        | 844.3749 | Duodenum (0.5 h) | 678 | KLGGRPT          | 727.4341 | Duodenum (1 h) |
| 664 | SFQLFGSPPGQR     | 1319.662 | Duodenum (0.5 h) | 679 | LAQVPSH          | 750.4024 | Duodenum (1 h) |
| 665 | SVDGKEDLIWKL     | 1401.75  | Duodenum (0.5 h) | 680 | LAVAPNH          | 720.3919 | Duodenum (1 h) |
| 666 | SVDGKEDLIWKLLSK  | 1729.961 | Duodenum (0.5 h) | 681 | LAVAPNHA         | 791.429  | Duodenum (1 h) |
| 667 | YAVAVVKK         | 876.5433 | Duodenum (0.5 h) | 682 | RSVDGKED         | 904.425  | Duodenum (1 h) |
| 668 | YAVAVVKKGSNF     | 1281.708 | Duodenum (0.5 h) | 683 | AQVPSHA          | 708.3555 | Duodenum (1 h) |
| 669 | YAVAVVKKGSNFQ    | 1409.767 | Duodenum (0.5 h) | 684 | AVAPNHAV         | 777.4133 | Duodenum (1 h) |
| 670 | YAVAVVKKGSNFQL   | 1522.851 | Duodenum (0.5 h) | 685 | DCVLRPT          | 802.4007 | Duodenum (1 h) |
| 671 | HLAQVPS          | 750.4024 | Duodenum (1 h)   | 686 | KANEGLT          | 731.3813 | Duodenum (1 h) |
| 672 | VLRPTEG          | 770.4286 | Duodenum (1 h)   | 687 | KLGAPSIT         | 785.4647 | Duodenum (1 h) |
| 673 | SCAPGADPK        | 844.3697 | Duodenum (1 h)   | 688 | QDGAGDV          | 660.2715 | Duodenum (1 h) |
| 674 | LDCVLRPT         | 915.4848 | Duodenum (1 h)   | 689 | RETAEV           | 832.3926 | Duodenum (1 h) |
| 675 | AVAPNHA          | 678.3449 | Duodenum (1 h)   | 690 | RIPSKVD          | 813.4708 | Duodenum (1 h) |

(continue)

| No. | Peptide sequence     | Mr. calc | Sample           | No. | Peptide sequence | Mr. calc | Sample          |
|-----|----------------------|----------|------------------|-----|------------------|----------|-----------------|
| 691 | SAGWIIPMGILRPY       | 1588.844 | Duodenum (0.5 h) | 706 | APVDAFK          | 746.3963 | Jejunum (0.5 h) |
| 692 | SAGWIIPMGILRPYL      | 1701.928 | Duodenum (0.5 h) | 707 | APVDAFKECHLAQVPS | 2344.211 | Jejunum (0.5 h) |
| 693 | SCAPGADPK            | 844.3749 | Duodenum (0.5 h) | 708 | AQEKFGK          | 806.4286 | Jejunum (0.5 h) |
| 694 | AAHVKQVLLHQALFGK     | 1887.084 | Jejunum (0.5 h)  | 709 | AQVPSHAVVAR      | 1133.631 | Jejunum (0.5 h) |
| 695 | AAHVKQVLLHQALFGK     | 2186.244 | Jejunum (0.5 h)  | 710 | AVAPNHAVVS       | 963.5138 | Jejunum (0.5 h) |
| 696 | ADAVTLDGGMVF         | 1194.559 | Jejunum (0.5 h)  | 711 | AVAPNHAVVSR      | 1119.615 | Jejunum (0.5 h) |
| 697 | ADAVTLDGGMVFEAGR     | 1607.761 | Jejunum (0.5 h)  | 712 | AVAVVKK          | 713.48   | Jejunum (0.5 h) |
| 698 | ADAVTLDGGMVFEAGRDPY  | 1982.904 | Jejunum (0.5 h)  | 713 | AVTLDGGMVFEAGR   | 1924.935 | Jejunum (0.5 h) |
| 699 | ADAVTLDGGMVFEAGRDPYK | 2110.999 | Jejunum (0.5 h)  | 714 | CGLVPVLAENR      | 1169.623 | Jejunum (0.5 h) |
| 700 | ADRDQYELL            | 1121.535 | Jejunum (0.5 h)  | 715 | DGGMVFEAGRDPYK   | 1540.698 | Jejunum (0.5 h) |
| 701 | AEKKADA              | 731.3813 | Jejunum (0.5 h)  | 716 | DLLFKDSALGF      | 1224.639 | Jejunum (0.5 h) |
| 702 | AFALECIR             | 921.4742 | Jejunum (0.5 h)  | 717 | DLLFKDSALGFLR    | 1493.824 | Jejunum (0.5 h) |
| 703 | ALNLDGGYIYTAGK       | 1454.741 | Jejunum (0.5 h)  | 718 | DSALGFLR         | 877.4658 | Jejunum (0.5 h) |
| 704 | ANEGLTWNSLK          | 1231.62  | Jejunum (0.5 h)  | 719 | DSALGFLRIPSK     | 1302.73  | Jejunum (0.5 h) |
| 705 | ANEGLTWNSLKDKK       | 1602.837 | Jejunum (0.5 h)  | 720 | DSALGFLRIPSKVDSA | 1951.042 | Jejunum (0.5 h) |



(continue)

| No. | Peptide sequence    | Mr. calc | Sample          | No. | Peptide sequence  | Mr. calc | Sample          |
|-----|---------------------|----------|-----------------|-----|-------------------|----------|-----------------|
| 721 | DSALGFLRIPSKVDSALYL | 2364.28  | Jejunum (0.5 h) | 736 | GILRPYLSWTESLEPLQ | 2427.316 | Jejunum (0.5 h) |
| 722 | EAGRDPYK            | 934.4508 | Jejunum (0.5 h) | 737 | GKCGLVPVLAENR     | 1354.739 | Jejunum (0.5 h) |
| 723 | ECHLAQVPSHAVVAR     | 1615.825 | Jejunum (0.5 h) | 738 | GLVPVLAENRK       | 1194.708 | Jejunum (0.5 h) |
| 724 | EKYYGYTGAFR         | 1353.635 | Jejunum (0.5 h) | 739 | GSNFQLDQLQGR      | 1361.669 | Jejunum (0.5 h) |
| 725 | ENTNGESTADWAK       | 1421.606 | Jejunum (0.5 h) | 740 | GSNFQLDQLQGRK     | 1489.764 | Jejunum (0.5 h) |
| 726 | EPYFGYSGAFK         | 1264.576 | Jejunum (0.5 h) | 741 | GSPPGQR           | 697.3507 | Jejunum (0.5 h) |
| 727 | ESPQTHYY            | 1023.43  | Jejunum (0.5 h) | 742 | HSSLDCVLRPTEGYLA  | 2384.289 | Jejunum (0.5 h) |
| 728 | ESPQTHYYAVAVVK      | 1590.804 | Jejunum (0.5 h) | 743 | IAEKKADA          | 844.4654 | Jejunum (0.5 h) |
| 729 | ESPQTHYYAVAVVKK     | 1718.899 | Jejunum (0.5 h) | 744 | IPSKVDSALY        | 1091.586 | Jejunum (0.5 h) |
| 730 | ETTVFENLPEK         | 1305.645 | Jejunum (0.5 h) | 745 | IPSKVDSALYLGSR    | 1504.825 | Jejunum (0.5 h) |
| 731 | ETTVFENLPEKADR      | 1647.81  | Jejunum (0.5 h) | 746 | ISQPEWFK          | 1033.523 | Jejunum (0.5 h) |
| 732 | FGYSGAFK            | 875.4178 | Jejunum (0.5 h) | 747 | KADAVTLD          | 831.4338 | Jejunum (0.5 h) |
| 733 | GEADALNLDGGYIY      | 1469.667 | Jejunum (0.5 h) | 748 | KADAVTLDGGMVF     | 1322.654 | Jejunum (0.5 h) |
| 734 | GEADALNLDGGYIYTAGK  | 1826.869 | Jejunum (0.5 h) | 749 | KADAVTLDGGMVFEAGR | 1735.856 | Jejunum (0.5 h) |
| 735 | GGMVFEAGRDPYK       | 1425.671 | Jejunum (0.5 h) | 750 | KADAVTLDGGMVFEAGR | 1866.878 | Jejunum (0.5 h) |

(continue)

| No. | Peptide sequence   | Mr. calc | Sample          | No. | Peptide sequence | Mr. calc | Sample          |
|-----|--------------------|----------|-----------------|-----|------------------|----------|-----------------|
| 751 | KDAVTLDGGMVFEAGR   | 2126.994 | Jejunum (0.5 h) | 766 | LAQVPSHAVVAR     | 1246.715 | Jejunum (0.5 h) |
| 752 | KDAVTLDGGMVFEAGR   | 2239.094 | Jejunum (0.5 h) | 767 | LAVAPNHAVVSR     | 1232.699 | Jejunum (0.5 h) |
| 753 | KANEGLT            | 731.3813 | Jejunum (0.5 h) | 768 | LAVAVVK          | 698.4691 | Jejunum (0.5 h) |
| 754 | KANEGLTWNSLK       | 1359.715 | Jejunum (0.5 h) | 769 | LAVAVVKK         | 826.564  | Jejunum (0.5 h) |
| 755 | KANEGLTWNSLKDKK    | 1730.932 | Jejunum (0.5 h) | 770 | LFGSPPGQR        | 957.5032 | Jejunum (0.5 h) |
| 756 | KGSNFQLDQLQGR      | 1489.764 | Jejunum (0.5 h) | 771 | LGAPSITCVR       | 1015.548 | Jejunum (0.5 h) |
| 757 | KGSNFQLDQLQGRK     | 1617.859 | Jejunum (0.5 h) | 772 | LGAPSITCVRR      | 1171.65  | Jejunum (0.5 h) |
| 758 | KLGRPTCVRR         | 1299.745 | Jejunum (0.5 h) | 773 | LGGRPTYEEY       | 1183.551 | Jejunum (0.5 h) |
| 759 | KLGRPT             | 727.4341 | Jejunum (0.5 h) | 774 | LGGRPTYEEYLGTE   | 1583.747 | Jejunum (0.5 h) |
| 760 | KLRPVAAEIY         | 1158.676 | Jejunum (0.5 h) | 775 | LGGRPTYEEYLGTEY  | 1746.81  | Jejunum (0.5 h) |
| 761 | KLRPVAAEIYGTK      | 1444.84  | Jejunum (0.5 h) | 776 | LGGRPTYEEYLGTEYV | 2557.306 | Jejunum (0.5 h) |
| 762 | KPVTEAQ            | 771.4127 | Jejunum (0.5 h) | 777 | LGGRPTYEEYLGTEYV | 2685.401 | Jejunum (0.5 h) |
| 763 | KPVTEAQSCHLAVAPNHA | 2313.201 | Jejunum (0.5 h) | 778 | LGTEYVTAIANLK    | 1391.766 | Jejunum (0.5 h) |
| 764 | KSCHTGLGR          | 957.4814 | Jejunum (0.5 h) | 779 | LGTEYVTAIANLKK   | 1519.861 | Jejunum (0.5 h) |
| 765 | KVDSALYLGSR        | 1207.656 | Jejunum (0.5 h) | 780 | LLCLDGTR         | 889.4691 | Jejunum (0.5 h) |

(continue)

| No. | Peptide sequence    | Mr. calc | Sample          | No. | Peptide sequence | Mr. calc | Sample          |
|-----|---------------------|----------|-----------------|-----|------------------|----------|-----------------|
| 781 | LLSKAQEKFGKNK       | 1489.862 | Jejunum (0.5 h) | 796 | SFQLFGSPPGQR     | 1319.662 | Jejunum (0.5 h) |
| 782 | LRIPSKVDSALYLGSR    | 1774.01  | Jejunum (0.5 h) | 797 | SKVDSALYLGSR     | 1294.688 | Jejunum (0.5 h) |
| 783 | LRPVAAEIY           | 1030.581 | Jejunum (0.5 h) | 798 | SVDGKEDLIWK      | 1288.666 | Jejunum (0.5 h) |
| 784 | LRPVAAEIYGTK        | 1316.745 | Jejunum (0.5 h) | 799 | TESLEPLQGAVAK    | 1341.714 | Jejunum (0.5 h) |
| 785 | LSWTESLEPLQGAVAK    | 1727.909 | Jejunum (0.5 h) | 800 | VDSALYLGSR       | 1079.561 | Jejunum (0.5 h) |
| 786 | NLLFNDNTECLAK       | 1493.718 | Jejunum (0.5 h) | 801 | VLKGEADAL        | 914.5073 | Jejunum (0.5 h) |
| 787 | NSLKDKK             | 831.4814 | Jejunum (0.5 h) | 802 | VLKGEADALNLDGGY  | 2167.116 | Jejunum (0.5 h) |
| 788 | PSKVDSALYL          | 1091.586 | Jejunum (0.5 h) | 803 | VTAIANLK         | 828.5069 | Jejunum (0.5 h) |
| 789 | QVLLHQQALFGK        | 1380.788 | Jejunum (0.5 h) | 804 | VTAIANLKK        | 956.6018 | Jejunum (0.5 h) |
| 790 | QVLLHQQALFGKNGK     | 1679.947 | Jejunum (0.5 h) | 805 | VVWCAVGPEEQK     | 1343.654 | Jejunum (0.5 h) |
| 791 | RAFALECIR           | 1077.575 | Jejunum (0.5 h) | 806 | WCTISQPEWFK      | 1423.66  | Jejunum (0.5 h) |
| 792 | SAGWIIPM            | 873.4418 | Jejunum (0.5 h) | 807 | YFGYSGAFK        | 1038.481 | Jejunum (0.5 h) |
| 793 | SAGWIIPMGILRPY      | 1572.849 | Jejunum (0.5 h) | 808 | YTRVVWCAVGPEEQK  | 1763.867 | Jejunum (0.5 h) |
| 794 | SAGWIIPMGILRPYLSWTE | 3282.748 | Jejunum (0.5 h) | 809 | YVTAIANLK        | 991.5702 | Jejunum (0.5 h) |
| 795 | SDRAAHVK            | 882.4671 | Jejunum (0.5 h) | 810 | YVTAIANLKK       | 1119.665 | Jejunum (0.5 h) |

(continue)

| No. | Peptide sequence | Mr. calc | Sample          | No. | Peptide sequence | Mr. calc | Sample        |
|-----|------------------|----------|-----------------|-----|------------------|----------|---------------|
| 811 | YYGYTGAFR        | 1096.498 | Jejunum (0.5 h) | 826 | TAGWNIPMGL       | 1058.522 | Ileum (0.5 h) |
| 812 | DSALGFLR         | 877.4658 | Jejunum (1 h)   | 827 | NLNREDFR         | 1062.521 | Ileum (0.5 h) |
| 813 | SFQLFGSPPGQR     | 1319.662 | Jejunum (1 h)   | 828 | YYGYTGAFR        | 1096.498 | Ileum (0.5 h) |
| 814 | NTNGEST          | 721.2879 | Jejunum (1 h)   | 829 | AVAPNHAVVSR      | 1119.615 | Ileum (0.5 h) |
| 815 | EDVGDVA          | 703.3025 | Ileum (0.5 h)   | 830 | LGGRPTYEEY       | 1183.551 | Ileum (0.5 h) |
| 816 | KPVTEAQ          | 771.4127 | Ileum (0.5 h)   | 831 | ANEGLTWNSLK      | 1231.62  | Ileum (0.5 h) |
| 817 | VGPEEQK          | 785.3919 | Ileum (0.5 h)   | 832 | LGGRPTYEEYL      | 1296.635 | Ileum (0.5 h) |
| 818 | DDQGLDK          | 789.3505 | Ileum (0.5 h)   | 833 | KANEGLTWNSLK     | 1359.715 | Ileum (0.5 h) |
| 819 | QQALFGK          | 790.4337 | Ileum (0.5 h)   | 834 | QVLLHQALFGK      | 1380.788 | Ileum (0.5 h) |
| 820 | LAVAVVKK         | 826.564  | Ileum (0.5 h)   | 835 | ENTNGESTADWAK    | 1421.606 | Ileum (0.5 h) |
| 821 | NSLKDKK          | 831.4814 | Ileum (0.5 h)   | 836 | ANEGLTWNSLKDK    | 1474.742 | Ileum (0.5 h) |
| 822 | GDDQGLDK         | 846.3719 | Ileum (0.5 h)   | 837 | KANEGLTWNSLKDK   | 1602.837 | Ileum (0.5 h) |
| 823 | TAGWNIPM         | 904.4113 | Ileum (0.5 h)   | 838 | GGRPTYEEYLGTEY   | 1633.726 | Ileum (0.5 h) |
| 824 | YGYTGAFR         | 933.4345 | Ileum (0.5 h)   | 839 | KANEGLTWNSLKDKK  | 1730.932 | Ileum (0.5 h) |
| 825 | VTAIANLKK        | 956.6018 | Ileum (0.5 h)   | 840 | LGGRPTYEEYLGTEY  | 1746.81  | Ileum (0.5 h) |

*(continue)*

| No. | Peptide sequence | Mr. calc | Sample        | No. | Peptide sequence | Mr. calc | Sample        |
|-----|------------------|----------|---------------|-----|------------------|----------|---------------|
| 841 | NTNGEST          | 721.2879 | Ileum (0.5 h) | 845 | ANEGLTWNSLK      | 1231.62  | Ileum (0.5 h) |
| 842 | DDQGLDK          | 789.3505 | Ileum (0.5 h) | 846 | NLDGGYIYTAGK     | 1270.619 | Ileum (0.5 h) |
| 843 | LAVAVVKK         | 826.564  | Ileum (0.5 h) | 847 | QVLLHQQALFGK     | 1380.788 | Ileum (0.5 h) |
| 844 | GDDQGLDK         | 846.3719 | Ileum (0.5 h) | 848 | KGSNFQLDQLQGR    | 1489.764 | Ileum (0.5 h) |

Note: The 848 peptides were marked from No.1 to No.848. The peptides in the content of stomach, duodenum, jejunum and ileum were marked as No.1 – No.623,

No.624 – No.693, No.694 – No.814, No.815 – No.848, respectively.
